# Supplementary material
Source: MDPI journal article supplement (https://www.mdpi.com/2673-8449/1/2/10)
Supplement: s1 [file s1]

## Article

# Isolation and Characterization of Bacteriophage ZCSE6 against *Salmonella* spp.: Phage Application in Milk

Abdallah S. Abdelsattar <sup>1,2</sup>, Anan Safwat <sup>1</sup>, Rana Nofal <sup>1</sup>, Amara Elsayed <sup>1</sup>, Salsabil Makky <sup>1</sup> and Ayman El-Shibiny <sup>1,3,\*</sup>

- <sup>1</sup> Center for Microbiology and Phage Therapy, Zewail City of Science and Technology, October Gardens, 6th of October City, Giza 12578, Egypt; p-abdallah.abdelsattar@zewailcity.edu.eg (A.S.A.); agaber@zewailcity.edu.eg (A.S.); p-rnofal@zewailcity.edu.eg (R.N.); s-ameraelsayed@zewailcity.edu.eg (A.E.); syoussef@zewailcity.edu.eg (S.M.)
- <sup>2</sup> Center for X-ray and Determination of Structure of Matter, Zewail City of Science and Technology, October Gardens, 6th of October City, Giza 12578, Egypt
- <sup>3</sup> Faculty of Environmental Agricultural Sciences, Arish University, Arish 45511, Egypt
- \* Correspondence: aelshibiny@zewailcity.edu.eg

**Table S1.** The host range for ZCSE6 phage against a variety *Salmonella enterica* strains.

| ID.       | <i>Salmonella</i> Bacteria | Serotype*                                     | The bacteriolytic activity of ZCSE6 |
|-----------|----------------------------|-----------------------------------------------|-------------------------------------|
| CMPZCSB1  | <i>Salmonella enterica</i> | <i>enterica</i> serotype Typhimurium          | Positive                            |
| CMPZCSB2  | <i>Salmonella enterica</i> | <i>enterica</i> serotype Blegdam              | Positive                            |
| CMPZCSB3  | <i>Salmonella enterica</i> | <i>enterica</i> serotype Kentucky             | Positive                            |
| CMPZCSB4  | <i>Salmonella enterica</i> | <i>enterica</i> serotype Blegdam              | Positive                            |
| CMPZCSB5  | <i>Salmonella enterica</i> | <i>enterica</i> serotype Typhimurium          | Positive                            |
| CMPZCSB6  | <i>Salmonella enterica</i> | <i>enterica</i> serotype Gallinarum           | Positive                            |
| CMPZCSB7  | <i>Salmonella enterica</i> | <i>enterica</i> serotype Enteritidis          | Positive                            |
| CMPZCSB8  | <i>Salmonella enterica</i> | <i>Salmonella enterica</i> spp.               | Positive                            |
| CMPZCSB9  | <i>Salmonella enterica</i> | <i>enterica</i> serotype Enteritidis          | Positive                            |
| CMPZCSB10 | <i>Salmonella enterica</i> | <i>Salmonella enterica</i> spp                | Positive                            |
| CMPZCSB11 | <i>Salmonella enterica</i> | <i>enterica</i> serotype Blegdam              | Positive                            |
| CMPZCSB12 | <i>Salmonella enterica</i> | <i>enterica</i> serotype Infantis             | Positive                            |
| CMPZCSB13 | <i>Salmonella enterica</i> | <i>enterica</i> serotype Harrisonburg         | Positive                            |
| CMPZCSB14 | <i>Salmonella enterica</i> | <i>enterica</i> serotype Typhimurium Rawlings | Positive                            |
| CMPZCSB15 | <i>Salmonella enterica</i> | <i>enterica</i> serotype Enteritidis          | Negative                            |
| CMPZCSB16 | <i>Salmonella enterica</i> | <i>enterica</i> serotype Kentucky             | Negative                            |
| CMPZCSB17 | <i>Salmonella enterica</i> | <i>enterica</i> serotype Virchow              | Negative                            |
| CMPZCSB18 | <i>Salmonella enterica</i> | <i>enterica</i> serotype Nigeria              | Negative                            |
| CMPZCSB19 | <i>Salmonella enterica</i> | <i>enterica</i> serotype Blegdam              | Negative                            |
| CMPZCSB20 | <i>Salmonella enterica</i> | <i>enterica</i> serotype Typhimurium          | Negative                            |
| CMPZCSB21 | <i>Salmonella enterica</i> | <i>enterica</i> serotype Kentucky             | Negative                            |
| CMPZCSB22 | <i>Salmonella enterica</i> | <i>enterica</i> serotype Senftenberg          | Negative                            |
| CMPZCSB23 | <i>Salmonella enterica</i> | <i>enterica</i> serotype Typhimurium          | Negative                            |
| CMPZCSB24 | <i>Salmonella enterica</i> | <i>enterica</i> serotype Thompson             | Negative                            |
| CMPZCSB25 | <i>Salmonella enterica</i> | <i>enterica</i> serotype Typhimurium Turner   | Negative                            |
| CMPZCSB26 | <i>Salmonella enterica</i> | <i>enterica</i> serotype Typhimurium Turner   | Negative                            |
| CMPZCSB27 | <i>Salmonella enterica</i> | <i>enterica</i> serotype Amsterdam            | Negative                            |
| CMPZCSB28 | <i>Salmonella enterica</i> | <i>enterica</i> serotype Montevideo           | Negative                            |
| CMPZCSB29 | <i>Salmonella enterica</i> | <i>Salmonella enterica</i> spp.               | Negative                            |

|           |                            |                                 |          |
|-----------|----------------------------|---------------------------------|----------|
| CMPZCSB30 | <i>Salmonella enterica</i> | <i>Salmonella enterica</i> spp. | Negative |
| CMPZCSB31 | <i>Salmonella enterica</i> | <i>Salmonella enterica</i> spp. | Negative |
| CMPZCSB32 | <i>Salmonella enterica</i> | <i>Salmonella enterica</i> spp. | Negative |
| CMPZCSB33 | <i>Salmonella enterica</i> | <i>Salmonella enterica</i> spp. | Negative |
| CMPZCSB34 | <i>Salmonella enterica</i> | <i>Salmonella enterica</i> spp. | Negative |
| CMPZCSB35 | <i>Salmonella enterica</i> | <i>Salmonella enterica</i> spp. | Negative |
| CMPZCSB36 | <i>Salmonella enterica</i> | <i>Salmonella enterica</i> spp. | Negative |
| CMPZCSB37 | <i>Salmonella enterica</i> | <i>Salmonella enterica</i> spp. | Negative |
| CMPZCSB38 | <i>Salmonella enterica</i> | <i>Salmonella enterica</i> spp. | Negative |
| CMPZCSB39 | <i>Salmonella enterica</i> | <i>Salmonella enterica</i> spp. | Negative |

\* *Salmonella enterica* spp. = the serotype was not determined.
